# Supplementary material
Source: PubMed Central journal article supplement (PMC6685543)

# Arterial stiffness

## Pulse wave velocity

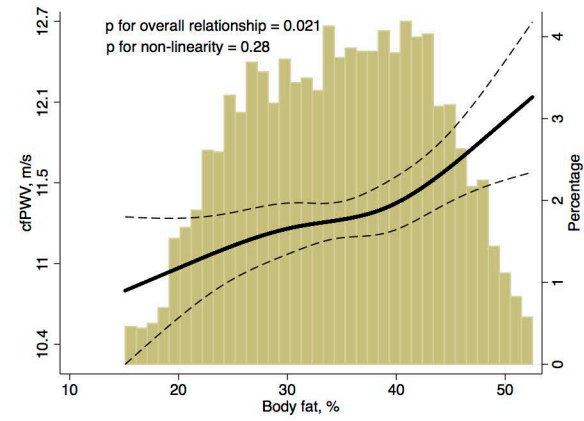

## Arterial elastance index

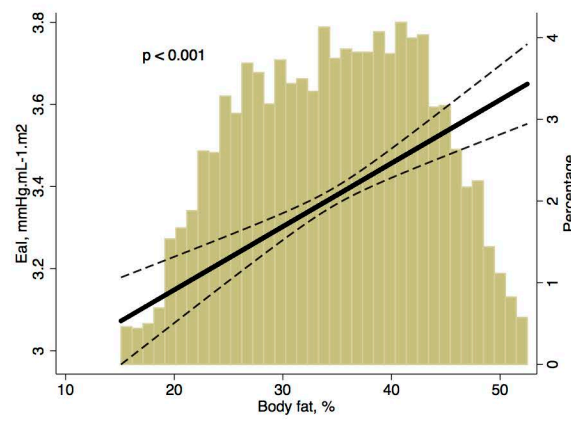

## Total arterial compliance index

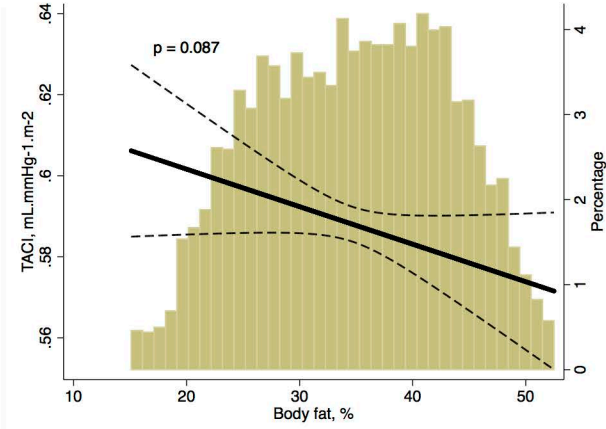

# Ventricular stiffness

## End-diastolic elastance index

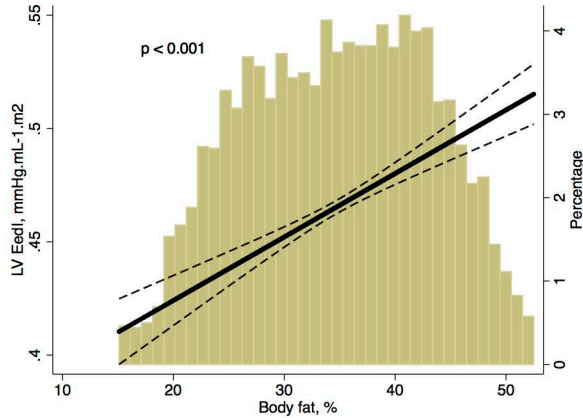

## End-systolic elastance index

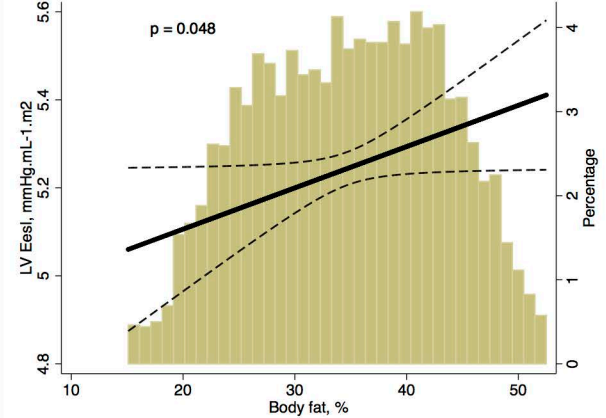

# Arterial stiffness

## Pulse wave velocity

$p$  for interaction = 0.53  
< 70 years old

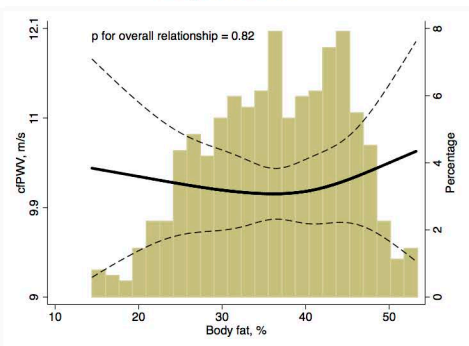

## 70 to < 80 years old

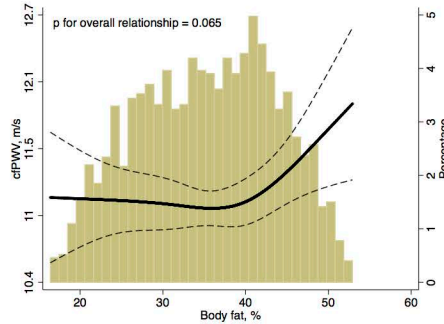

## 80 years old or older

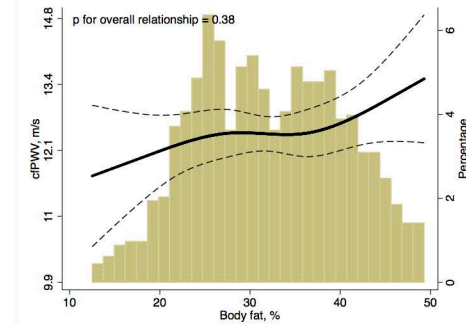

# Arterial elastance Index

$p$  for interaction = 0.30  
< 70 years old

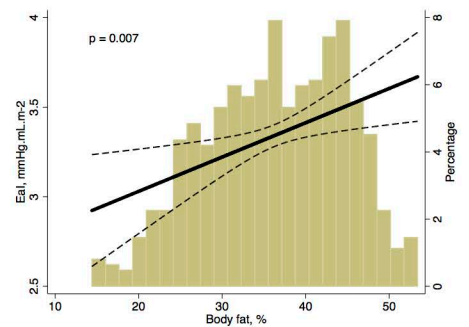

## 70 to < 80 years old

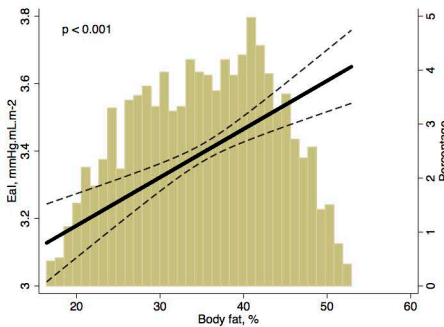

## 80 years old or older

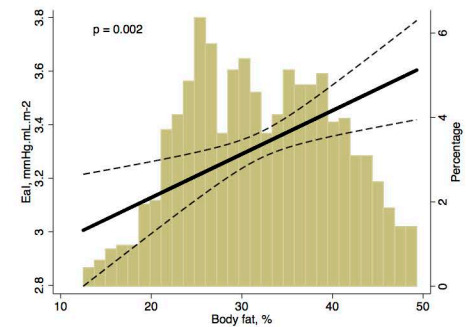

# Total arterial compliance index

$p$  for interaction = 0.43  
< 70 years old

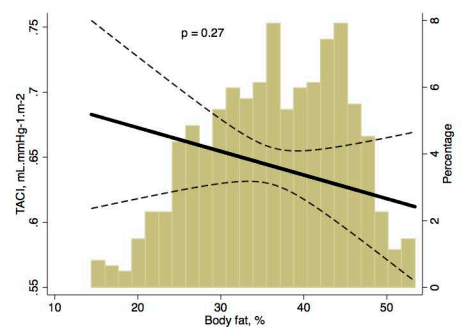

## 70 to < 80 years old

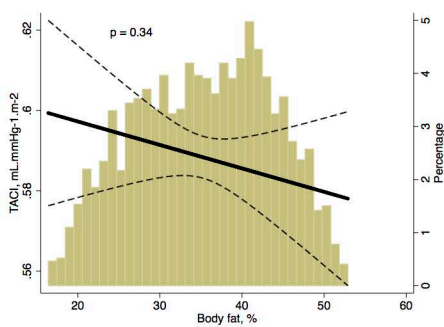

## 80 years old or older

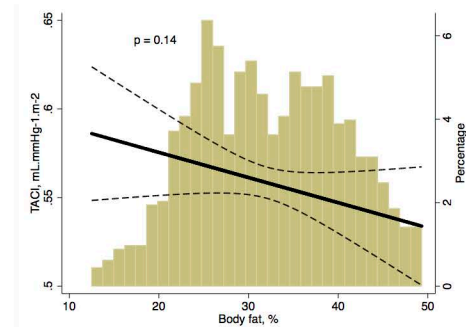

# Ventricular stiffness

## End-diastolic elastance index

$p$  for interaction = 0.39

< 70 years old

70 to < 80 years old

80 years old or older

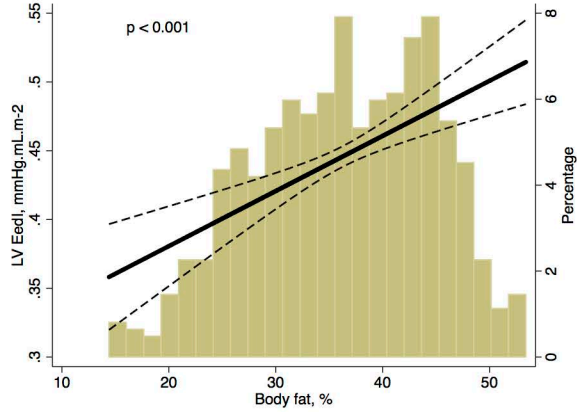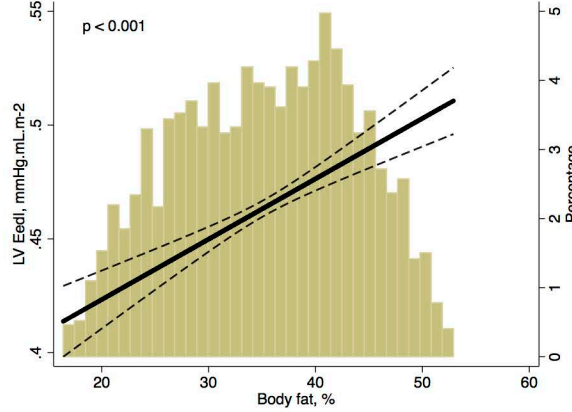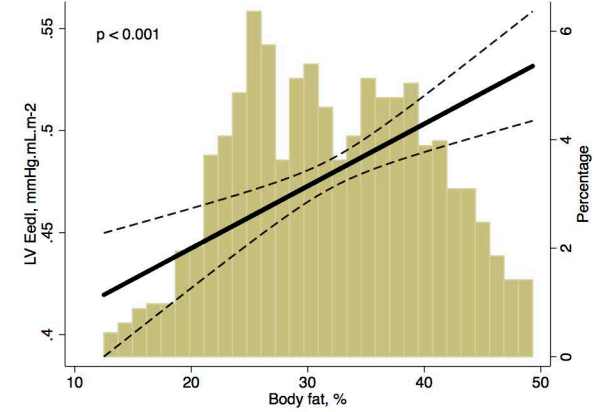

## End-systolic elastance Index

$p$  for interaction = 0.38

< 70 years old

70 to < 80 years old

80 years old or older

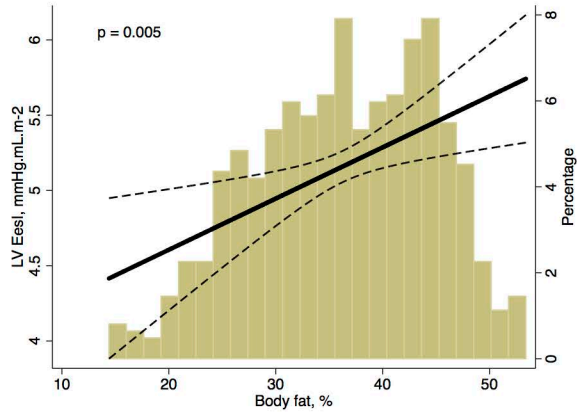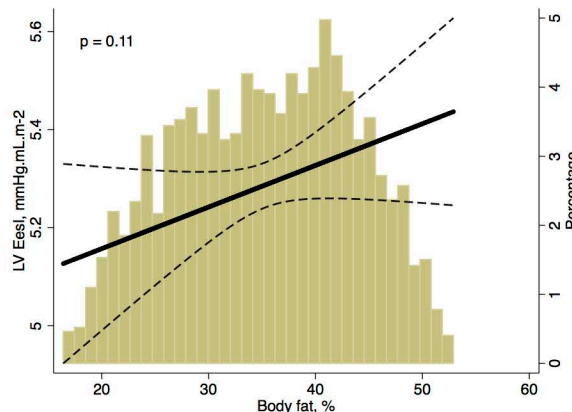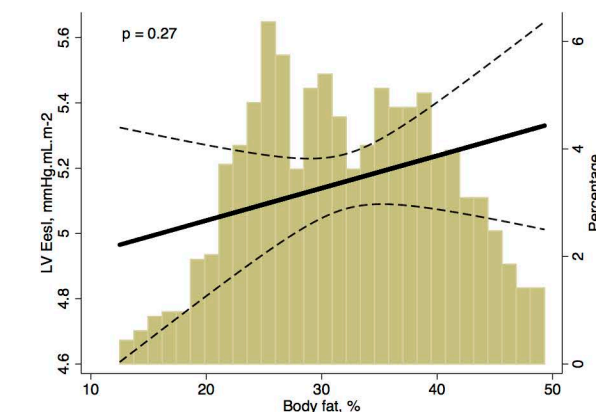

# Arterial stiffness

## Pulse wave velocity

Women

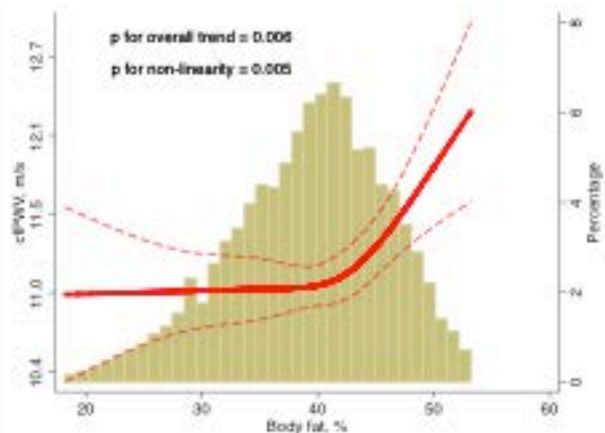

## Arterial elastance index

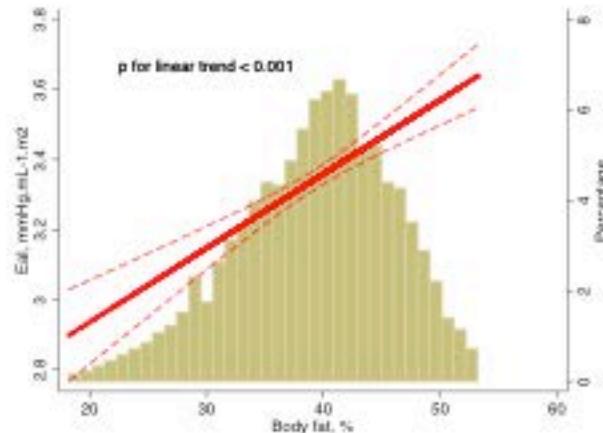

## Total arterial compliance index

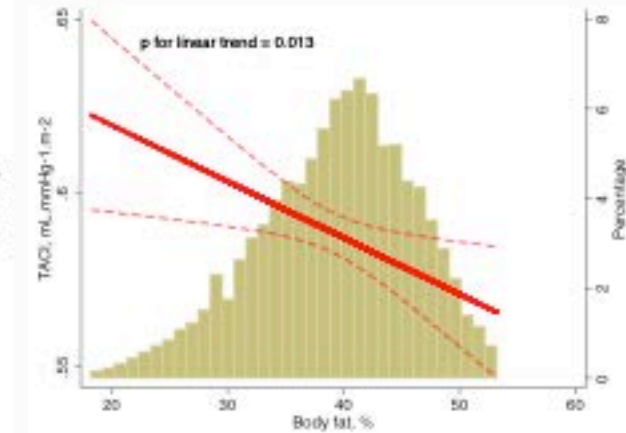

Men

$p$  for sex interaction = 0.044

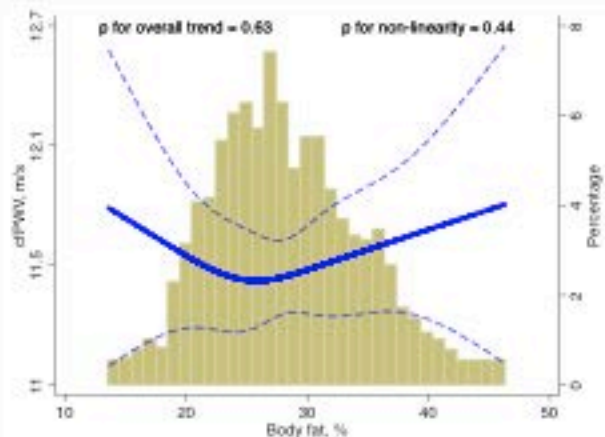

$p$  for sex interaction = 0.044

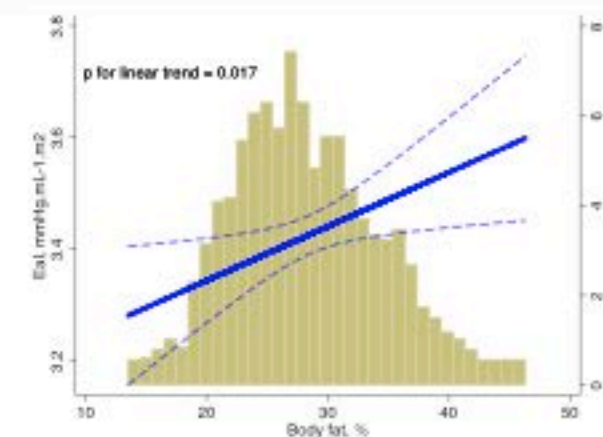

$p$  for sex interaction = 0.51

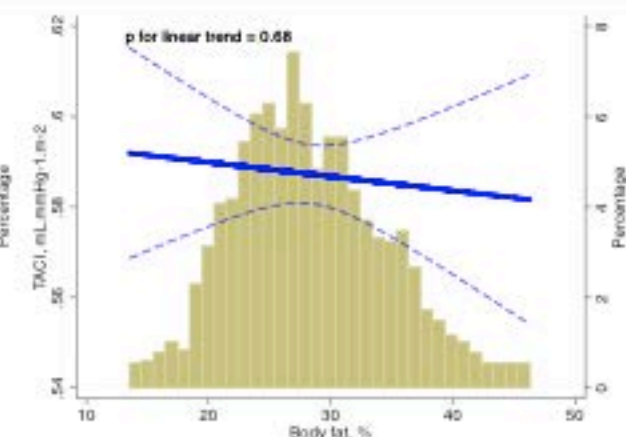

Men

Women

# Ventricular stiffness

## End-diastolic elastance index

### Women

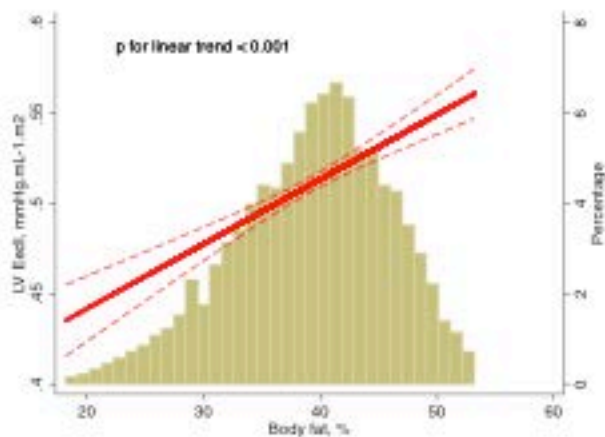

p for sex interaction = 0.39

## End-systolic elastance index

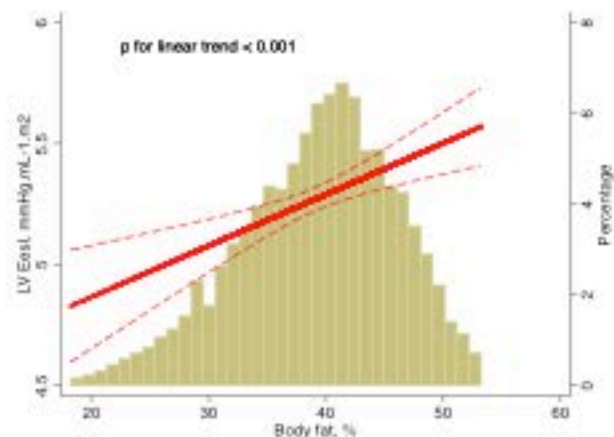

p for sex interaction = 0.12

### Men

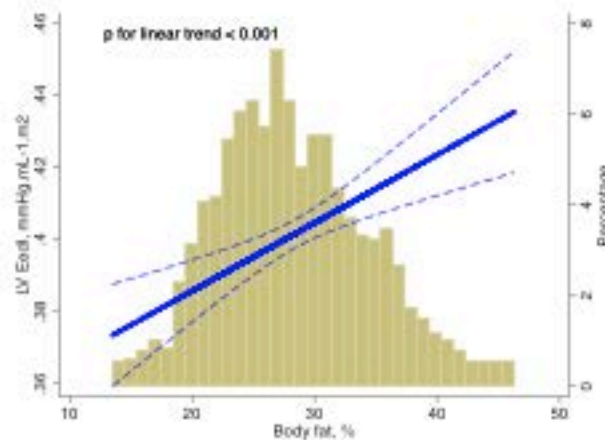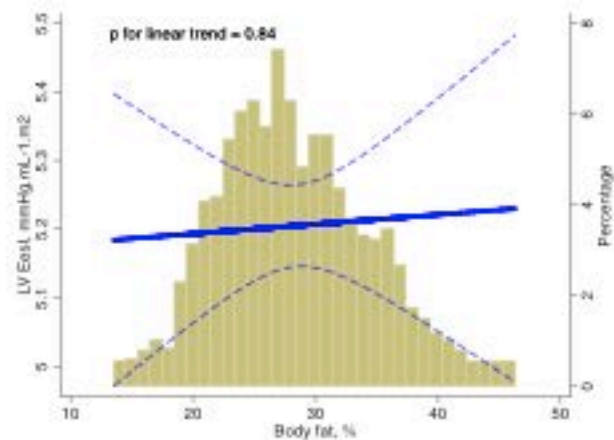

— Men

— Women

# Arterial stiffness

## Pulse wave velocity

### Blacks

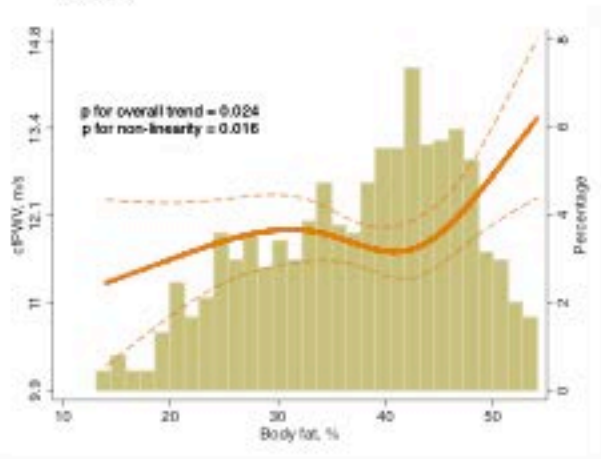

## Arterial elastance index

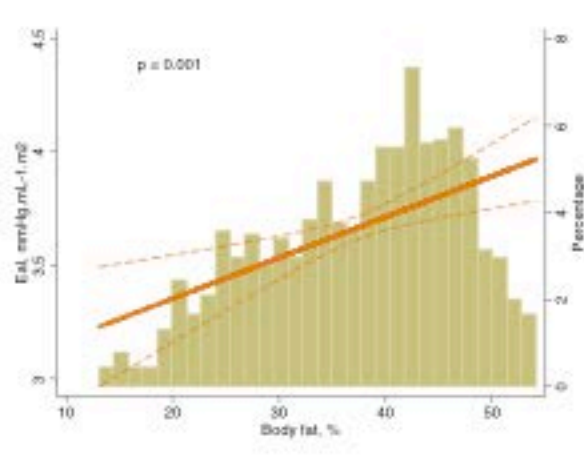

## Total arterial compliance index

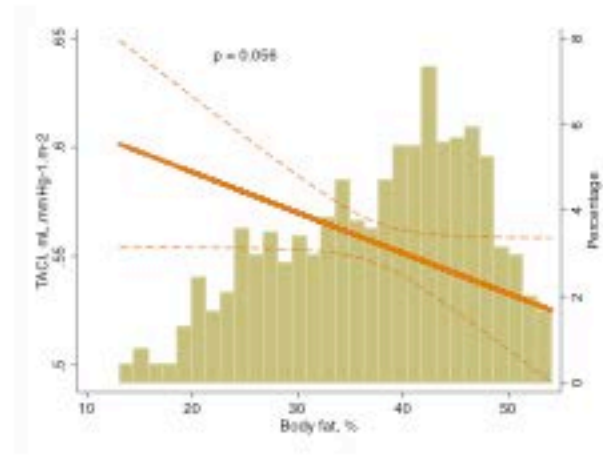

### Whites

p for sex interaction = 0.12

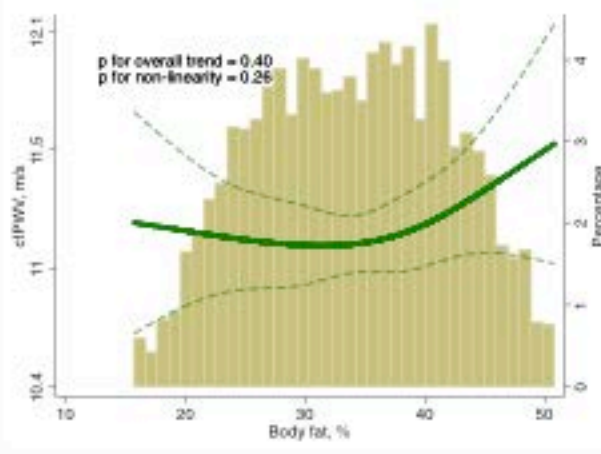

p for sex interaction = 0.56

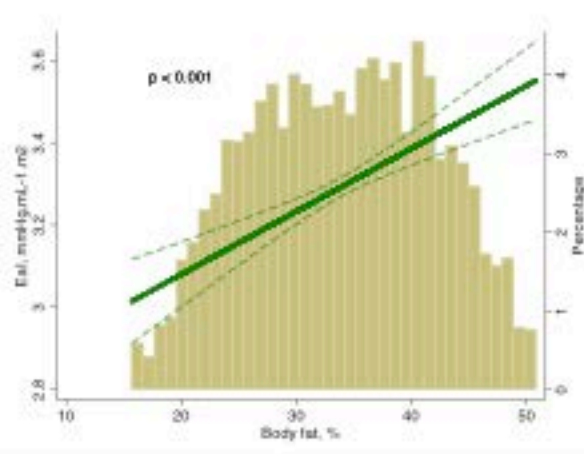

p for sex interaction = 0.70

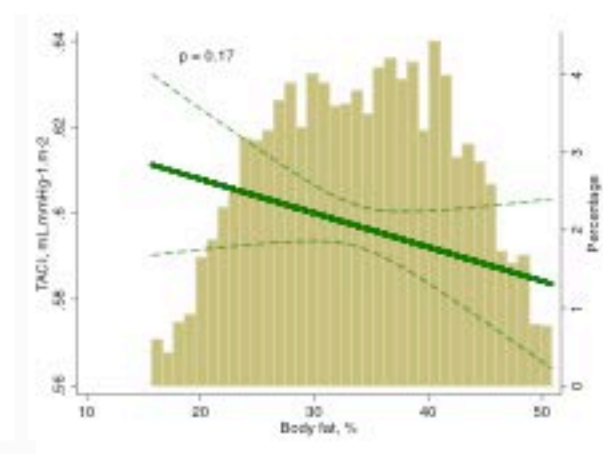

Blacks

Whites

# Ventricular stiffness

## End-diastolic elastance index

### Blacks

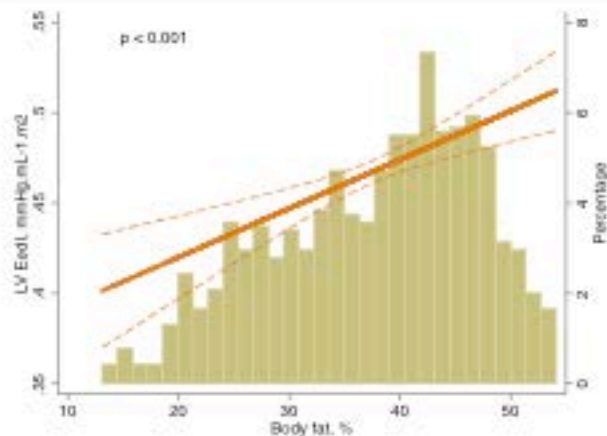

## End-systolic elastance index

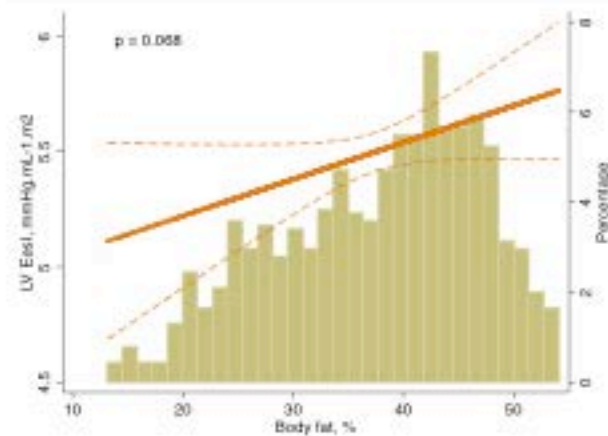

### Whites

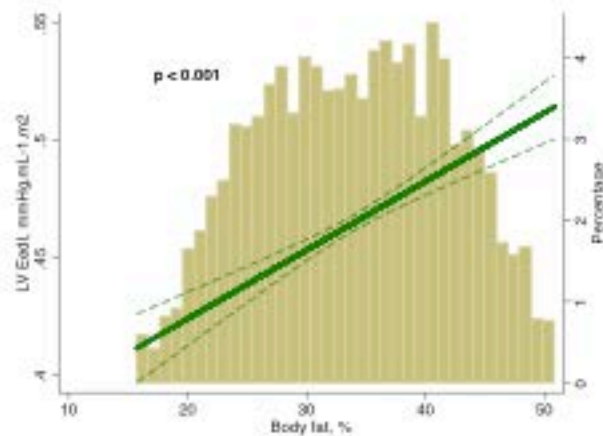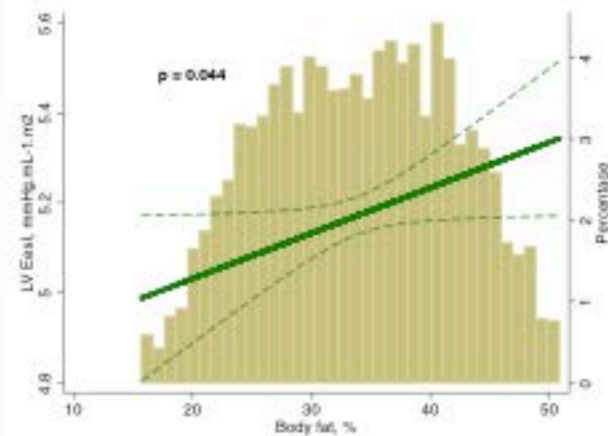

Blacks

Whites

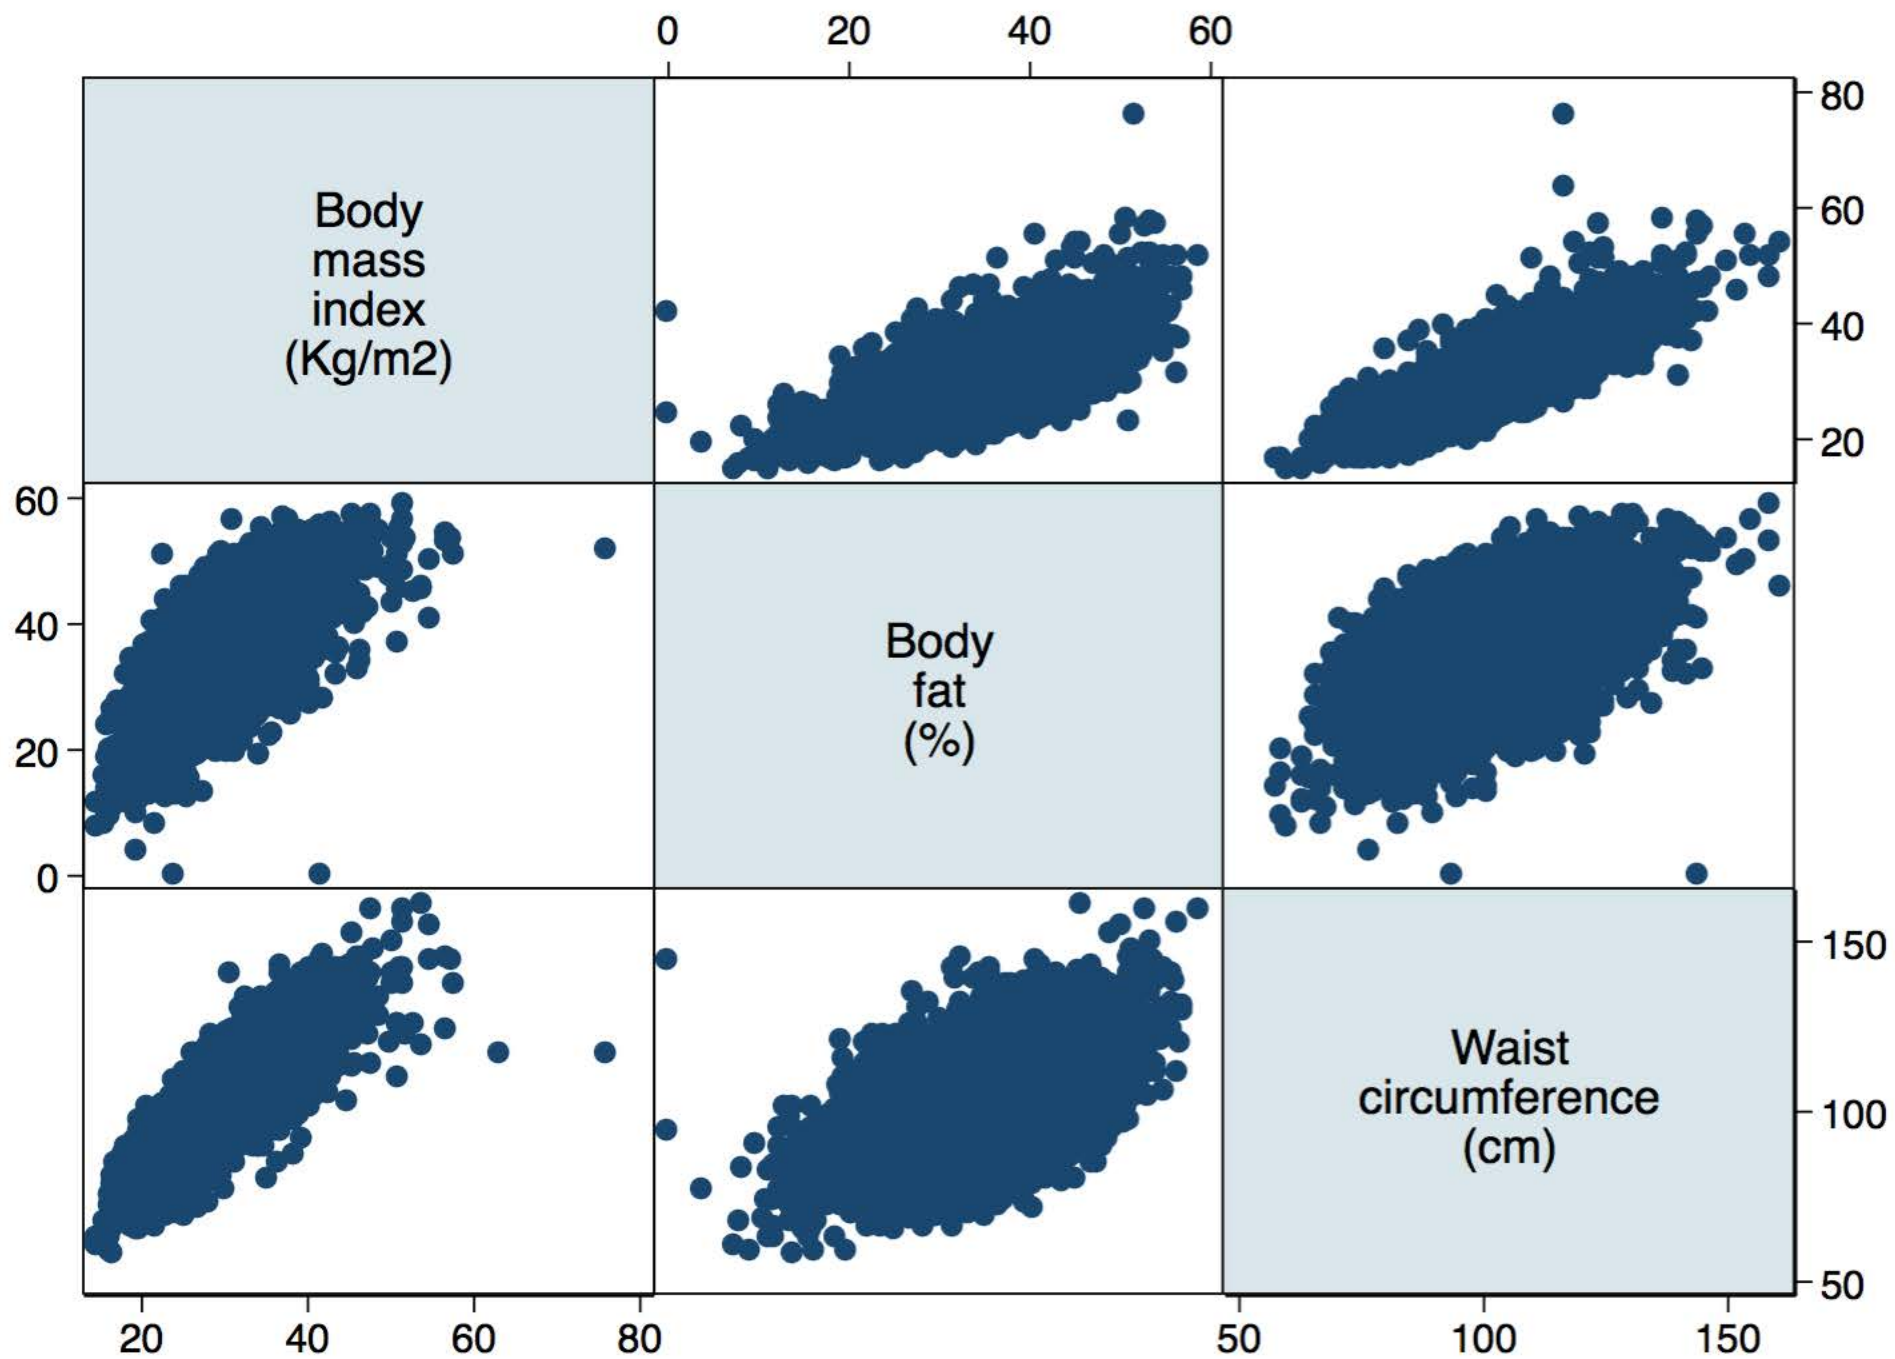



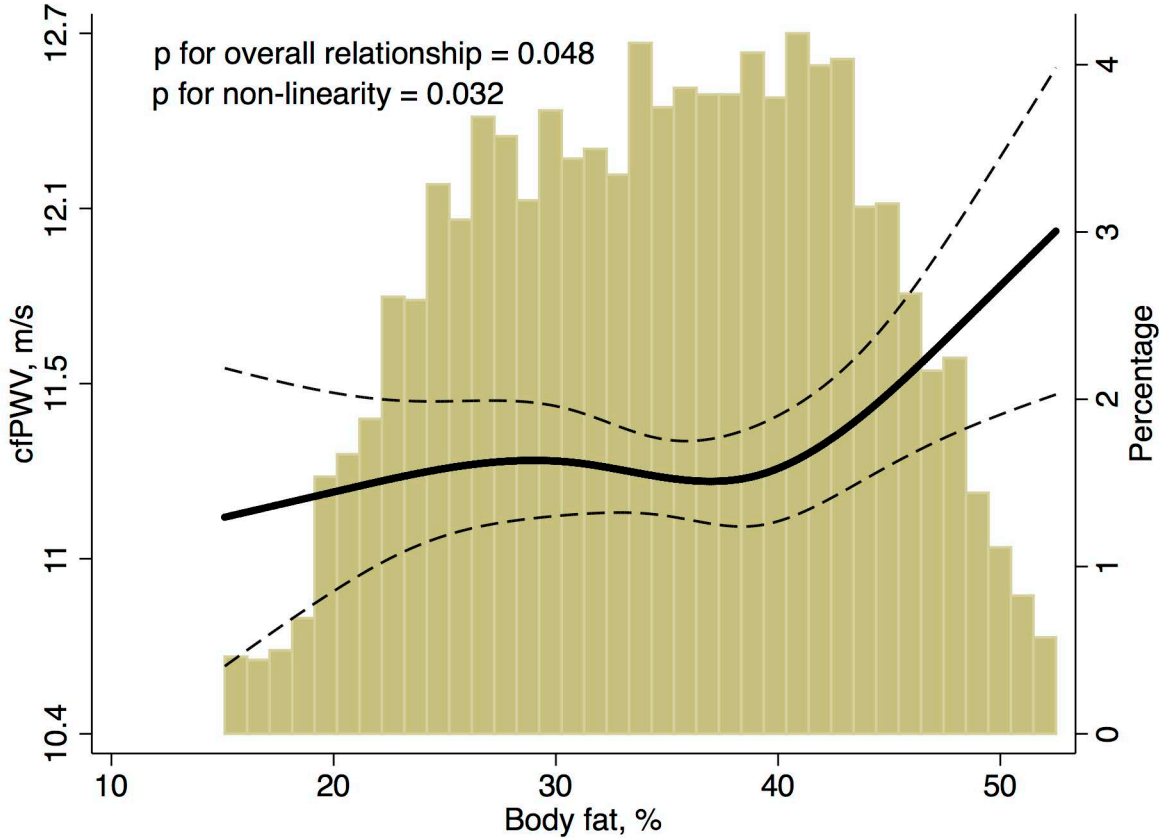

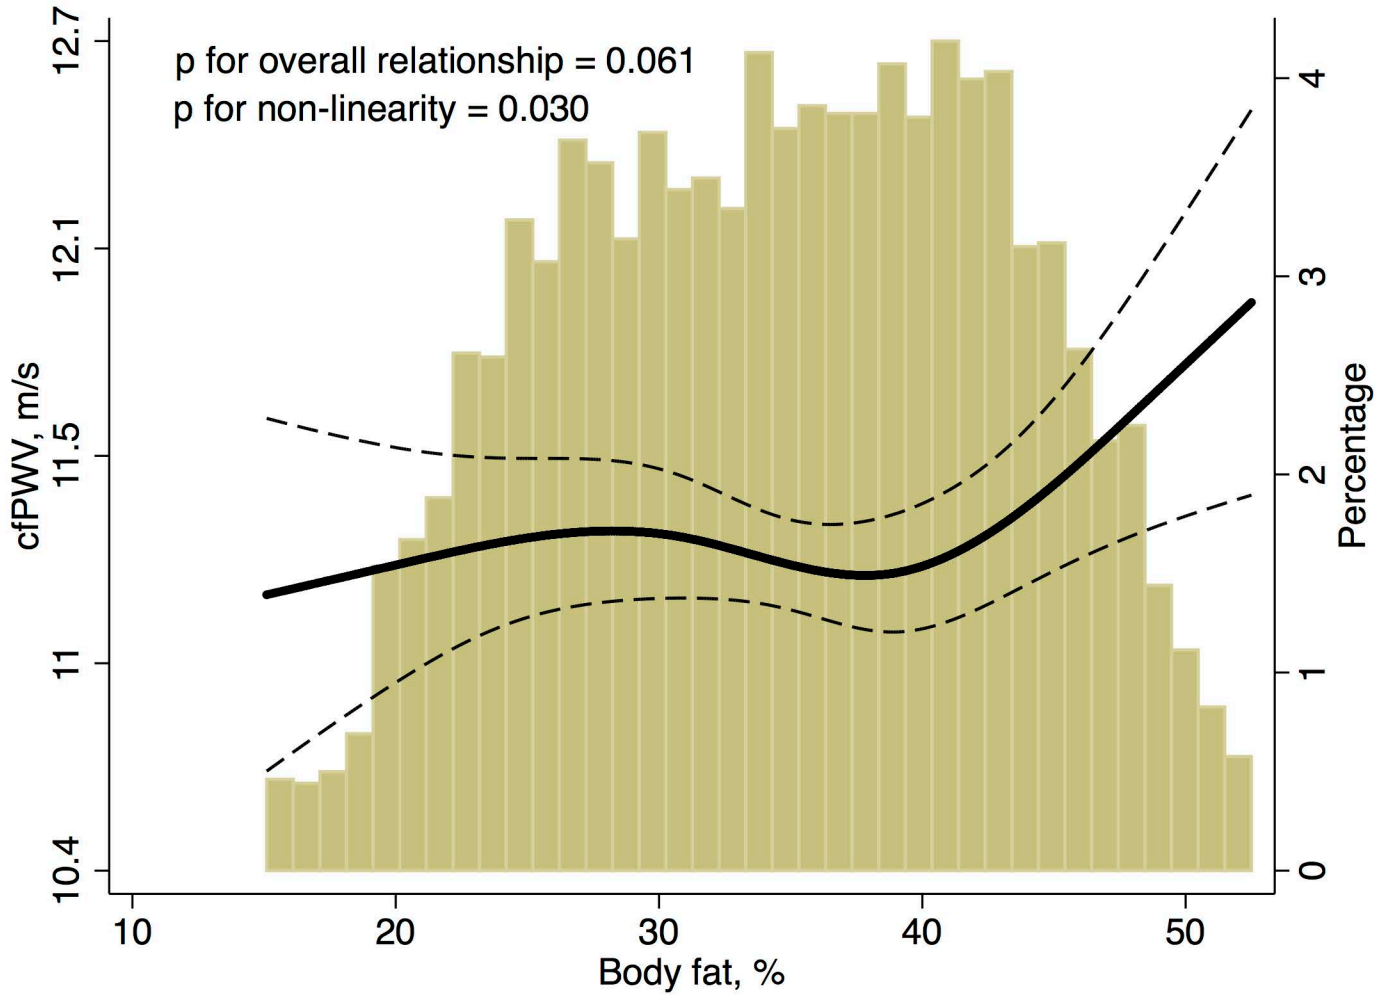

Supplement: NIHMS951424-supplement-Supp_figS1-10.pdf [file NIHMS951424-supplement-Supp_figS1-10.pdf]
